# Supplementary material
Source: Frontiers journal article supplement (https://www.frontiersin.org/articles/479437)
Supplement: Data_Sheet_1.PDF [file Data_Sheet_1.PDF]

**Supplementary Table I. The area under the curve of the body fat measuring indexes for ischemic stroke.**

| Test variables        | Area under the curve | 95% Confidence Interval |             |
|-----------------------|----------------------|-------------------------|-------------|
|                       |                      | Lower Bound             | Upper Bound |
| BMI                   | 0.548                | 0.512                   | 0.584       |
| Waist circumference   | 0.613                | 0.579                   | 0.647       |
| Waist-to-hip ratio    | 0.603                | 0.568                   | 0.638       |
| Waist-to-height ratio | 0.628                | 0.594                   | 0.661       |

**Supplementary Table II. Odds ratio (95% confidence intervals) for ischemic stroke prevalence rate, according to quartiles of BMI, waist circumference, waist-to-hip ratio, and waist-to-height ratio.**

| Body fat measuring indexes     | Quartiles of body fat measuring indexes |                    |                    |                    | P for trend | Per SD increase    |
|--------------------------------|-----------------------------------------|--------------------|--------------------|--------------------|-------------|--------------------|
|                                | Q1                                      | Q2                 | Q3                 | Q4                 |             |                    |
| <b>BMI(kg/m<sup>2</sup>)</b>   | <22.19                                  | 22.19-24.21        | 24.22-26.63        | ≥26.64             | —           | —                  |
| No of events                   | 1003(24.9)                              | 986(24.5)          | 1027(25.5)         | 1009(25.1)         | —           | —                  |
| Model 1 <sup>*</sup>           | 1                                       | 0.980(0.667,1.439) | 1.371(0.960,1.956) | 1.417(0.993,2.021) | 0.019       | 1.157(1.024,1.307) |
| Model 2 <sup>†</sup>           | 1                                       | 1.064(0.718,1.577) | 1.483(1.028,2.138) | 1.525(1.058,2.198) | 0.009       | 1.194(1.053,1.354) |
| Model 3 <sup>‡</sup>           | 1                                       | 0.944(0.628,1.420) | 1.271(0.865,1.867) | 1.095(0.739,1.623) | 0.448       | 1.066(0.932,1.220) |
| <b>Waist circumference(cm)</b> | <80.0                                   | 80.0-84.9          | 85.00-91.9         | ≥92.00             | —           | —                  |
| No of events                   | 974(24.2)                               | 1082(26.9)         | 905(22.5)          | 1064(26.4)         | —           | —                  |
| Model 1 <sup>*</sup>           | 1                                       | 1.476(0.965,2.258) | 2.083(1.375,3.157) | 2.823(1.912,4.167) | <0.001      | 1.450(1.281,1.641) |
| Model 2 <sup>†</sup>           | 1                                       | 1.224(0.794,1.888) | 1.476(0.964,2.260) | 1.951(1.306,2.915) | <0.001      | 1.274(1.116,1.455) |
| Model 3 <sup>‡</sup>           | 1                                       | 1.059(0.678,1.655) | 1.154(0.740,1.799) | 1.354(0.886,2.070) | 0.102       | 1.108(0.961,1.278) |

|                              |            |                    |                    |                    |        |                    |
|------------------------------|------------|--------------------|--------------------|--------------------|--------|--------------------|
| <b>Waist-to-hip ratio</b>    | <0.8800    | 0.8800-0.8946      | 0.8947-0.9037      | $\geq 0.9038$      | —      | —                  |
| No of events                 | 1004(24.9) | 992(24.6)          | 957(23.9)          | 1072(26.6)         | —      | —                  |
| Model 1 <sup>*</sup>         | 1          | 1.013(0.666,1.539) | 1.543(1.047,2.272) | 2.309(1.616,3.300) | <0.001 | 1.347(1.179,1.538) |
| Model 2 <sup>†</sup>         | 1          | 1.103(0.718,1.693) | 1.256(0.846,1.866) | 1.763(1.222,2.542) | 0.003  | 1.229(1.076,1.405) |
| Model 3 <sup>‡</sup>         | 1          | 1.156(0.730,1.831) | 1.108(0.720,1.704) | 1.394(0.949,2.049) | 0.099  | 1.128(0.984,1.294) |
| <b>Waist-to-height ratio</b> | <0.4878    | 0.4878-0.5272      | 0.5273-0.5648      | $\geq 0.5649$      | —      | —                  |
| No of events                 | 998(24.8)  | 1014(25.2)         | 1005(25.0)         | 1008(25.0)         | —      | —                  |
| Model 1 <sup>*</sup>         | 1          | 1.987(1.250,3.159) | 3.034(1.958,4.711) | 3.858(2.514,5.920) | <0.001 | 1.532(1.356,1.731) |
| Model 2 <sup>†</sup>         | 1          | 1.695(1.058,2.716) | 2.330(1.489,3.644) | 2.709(1.740,4.217) | <0.001 | 1.373(1.203,1.567) |
| Model 3 <sup>‡</sup>         | 1          | 1.396(0.859,2.270) | 1.793(1.126,2.857) | 1.863(1.165,2.980) | 0.007  | 1.198(1.039,1.382) |

\* Unadjusted.

† Adjusted for age and sex.

‡ Adjusted for age, sex, area, education, smoking, drinking, hypertension, diabetes, hyperlipidemia, coronary heart disease, family history of stroke, and regular exercise.

**Supplementary Table III. The area under the curve of the body fat measuring indexes for stroke in different sexes.**

| Test variables        | Area under the<br>curve | 95% Confidence Interval |             |
|-----------------------|-------------------------|-------------------------|-------------|
|                       |                         | Lower Bound             | Upper Bound |
| Male                  |                         |                         |             |
| BMI                   | 0.508                   | 0.459                   | 0.556       |
| Waist circumference   | 0.546                   | 0.500                   | 0.593       |
| Waist-to-hip ratio    | 0.540                   | 0.493                   | 0.586       |
| Waist-to-height ratio | 0.583                   | 0.537                   | 0.629       |
| Female                |                         |                         |             |
| BMI                   | 0.578                   | 0.530                   | 0.627       |
| Waist circumference   | 0.643                   | 0.596                   | 0.690       |
| Waist-to-hip ratio    | 0.634                   | 0.587                   | 0.681       |
| Waist-to-height ratio | 0.683                   | 0.639                   | 0.727       |

**Supplementary Table IV. Pairwise comparison of ROC curves of body fat measuring indexes for stroke. (Z, P)**

| Indicators            | BMI           | Waist circumference | Waist-to-hip ratio | Waist-to-height ratio |
|-----------------------|---------------|---------------------|--------------------|-----------------------|
| BMI                   | --            | 5.202,<0.0001       | 2.875,0.0040       | 5.992,<0.0001         |
| Waist circumference   | 5.202,<0.0001 | --                  | 1.407,0.1593       | 1.851,0.0641          |
| Waist-to-hip ratio    | 2.875,0.0040  | 1.407,0.1593        | --                 | 2.484,0.0130          |
| Waist-to-height ratio | 5.992,<0.0001 | 1.851,0.0641        | 2.484,0.0130       | --                    |

**Supplementary Table V. Pairwise comparison of ROC curves of body fat measuring indexes for ischemic stroke. (Z, P)**

| Indicators            | BMI           | Waist circumference | Waist-to-hip ratio | Waist-to-height ratio |
|-----------------------|---------------|---------------------|--------------------|-----------------------|
| BMI                   | --            | 5.110,<0.0001       | 3.154,0.0016       | 5.784,<0.0001         |
| Waist circumference   | 5.110,<0.0001 | --                  | 0.867,0.3859       | 1.710,0.0872          |
| Waist-to-hip ratio    | 3.154,0.0016  | 0.867,0.3859        | --                 | 1.904,0.0569          |
| Waist-to-height ratio | 5.784,<0.0001 | 1.710,0.0872        | 1.904,0.0569       | --                    |

**Supplementary Table VI. Pairwise comparison of ROC curves of body fat measuring indexes for stroke in males. (Z, P)**

| Indicators            | BMI           | Waist circumference | Waist-to-hip ratio | Waist-to-height ratio |
|-----------------------|---------------|---------------------|--------------------|-----------------------|
| BMI                   | --            | 2.321,0.0203        | 1.349,0.1772       | 4.135,<0.0001         |
| Waist circumference   | 2.321,0.0203  | --                  | 0.451,0.6523       | 3.807,<0.0001         |
| Waist-to-hip ratio    | 1.349,0.1772  | 0.451,0.6523        | --                 | 2.589,0.0096          |
| Waist-to-height ratio | 4.135,<0.0001 | 3.807,<0.0001       | 2.589,0.0096       | --                    |

**Supplementary Table VII. Pairwise comparison of ROC curves of body fat measuring indexes for stroke in females. (Z, P)**

| Indicators            | BMI           | Waist circumference | Waist-to-hip ratio | Waist-to-height ratio |
|-----------------------|---------------|---------------------|--------------------|-----------------------|
| BMI                   | --            | 3.687,0.0002        | 2.412,0.0158       | 5.839,<0.0001         |
| Waist circumference   | 3.687,0.0002  | --                  | 0.579,0.5626       | 4.884,<0.0001         |
| Waist-to-hip ratio    | 2.412,0.0158  | 0.579,0.5626        | --                 | 3.059,0.0022          |
| Waist-to-height ratio | 5.839,<0.0001 | 4.884,<0.0001       | 3.059,0.0022       | --                    |
